# Supplementary figures and images for: Financial Victimization of Adults With Severe Mental Illness
Source: Atypon-hosted journal article supplement (doi:10.1176/appi.ps.005882012), 2013-09-01

Appendix A

Figure 1. Path Analysis with Standardized Estimates.

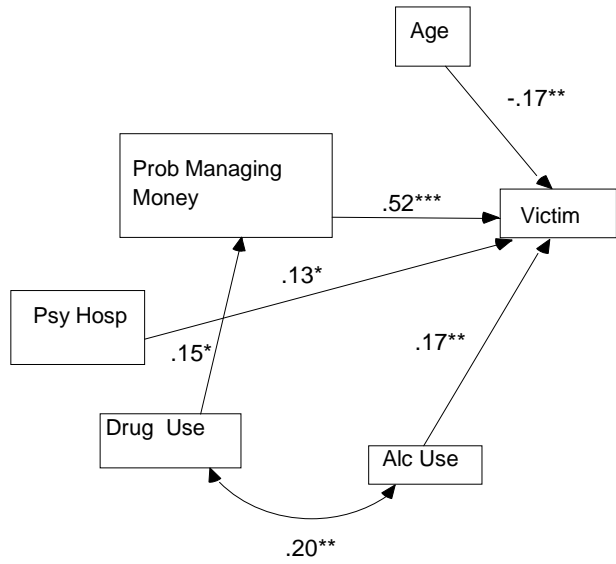

\* $p < .10$ , \*\* $p < .05$ , \*\*\* $p < .01$

Supplement: 918_ds001.pdf [file 918_ds001.pdf]
